# Supplementary material for: Profiling Patients by Intensity of Nursing Care: An Operative Approach Using Machine Learning
Source: PubMed Central journal article supplement (PMC7768500; doi:10.3390/jpm10040279), 2020-12-14
Supplement: jpm-10-00279-s001.pdf [file jpm-10-00279-s001.pdf]

**Supplementary material**

**Supplementary Materials, Figure 1** Distribution of silhouette width by cluster in the CLARA algorithm. Green dotted lines comprises the best possible cluster; blue dotted lines, uncertain cluster; and red, possibly wrong cluster.

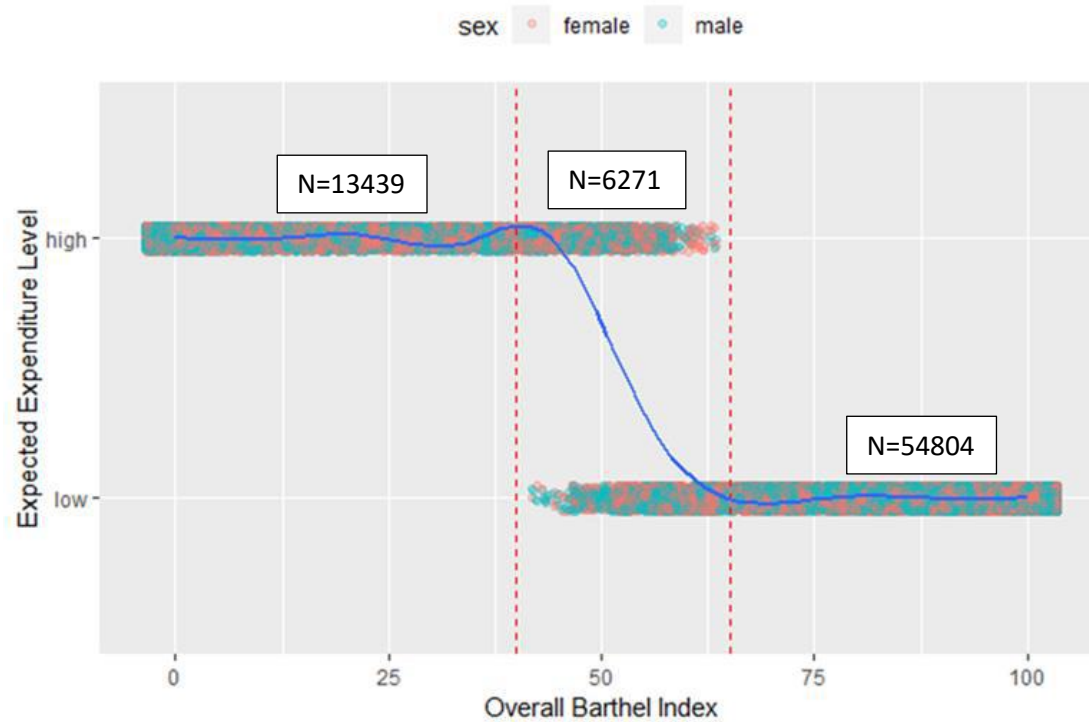

Profiling patients by Intensity of Nursing Care: an Operative Approach using Machine Learning  
Ocagli et al.

**Supplementary Materials, Table S1** Predictive performances of the two-step algorithm over Group 1 (BI<45) and Group 2 (BI>65), the gold standard, and in the overall sample. Measures of performances are evaluated using the data provided by the validation part of the 10-fold cross-validation. In the third column, results for the overall algorithm.

|                             | <b>Sensitivity</b> | <b>Specificity</b> | <b>Accuracy</b> | <b>F1</b> |
|-----------------------------|--------------------|--------------------|-----------------|-----------|
| <b>Group 1 (BI &lt;45),</b> | 0.99               | 0.99               | 0.99            | 0.97      |
| <b>Group 2 (BI&gt;65)</b>   |                    |                    |                 |           |
| <b>Gold standard</b>        | 0.62               | 0.71               | 0.67            | 0.64      |
